# Supplementary material for: Two-dimensional molybdenum disulphide nanosheet-covered metal nanoparticle array as a floating gate in multi-functional flash memories
Source: Royal Society of Chemistry journal article supplement (doi:10.1039/c5nr05054e), 2015-01-01
Supplement: c5nr05054e1.pdf [file c5nr05054e1.pdf]

# Supporting Information

## Two-dimensional molybdenum disulphide nanosheets covered metal nanoparticle array as floating gate in multi-functional flash memories

*Su-Ting Han,<sup>a</sup> Ye Zhou,<sup>b</sup> Bo Chen,<sup>c</sup> Li Zhou,<sup>a</sup> Yan Yan,<sup>a</sup> Hua Zhang,<sup>c</sup> and V. A. L. Roy*

*a\**

<sup>a</sup>Department of Physics and Materials Science, City University of Hong Kong, Hong Kong SAR

<sup>b</sup>Institute for Advanced Study, Shenzhen University, Shenzhen, Guangdong, PR China

<sup>c</sup>School of Materials Science and Engineering, Nanyang Technological University, Singapore

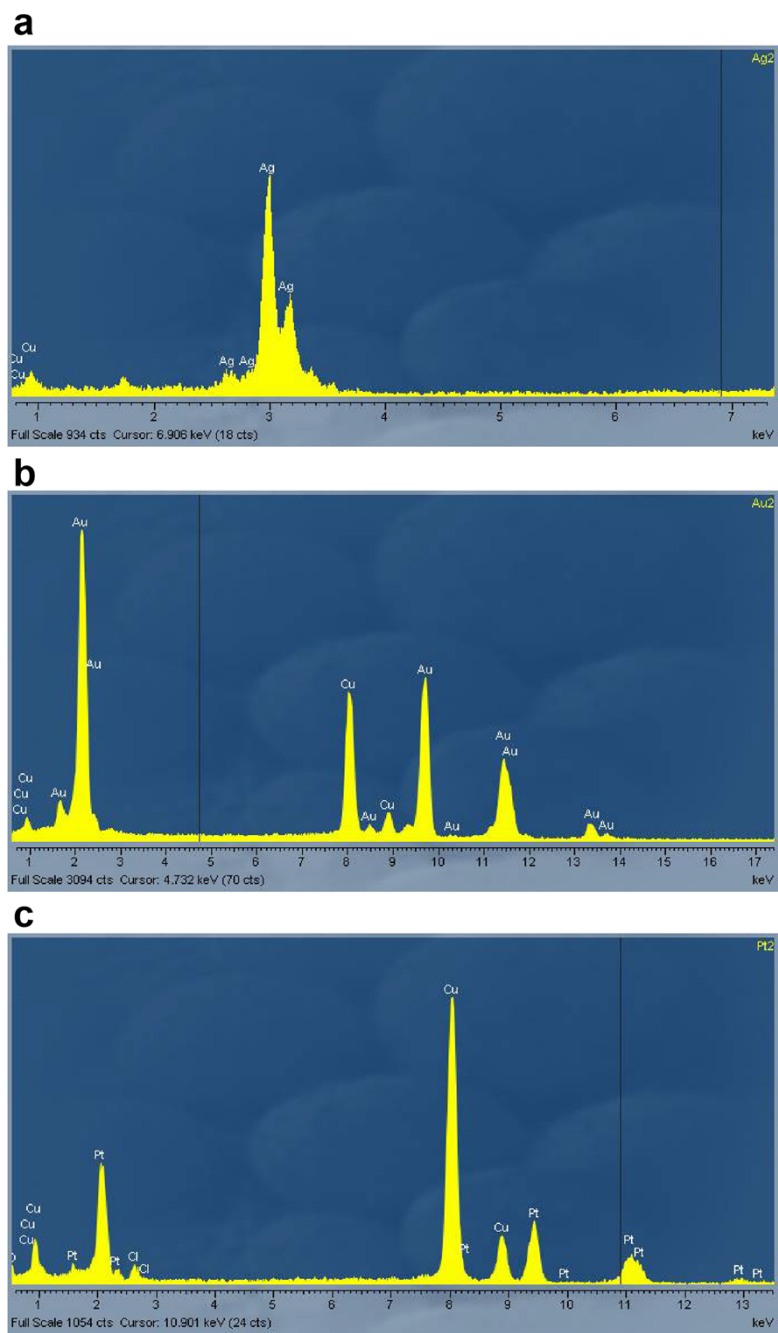

**Figure S1.** Energy-dispersive X-ray spectroscopy (EDS) spectra of (a) Ag NPs (b) Au NPs and (c) Pt NPs.

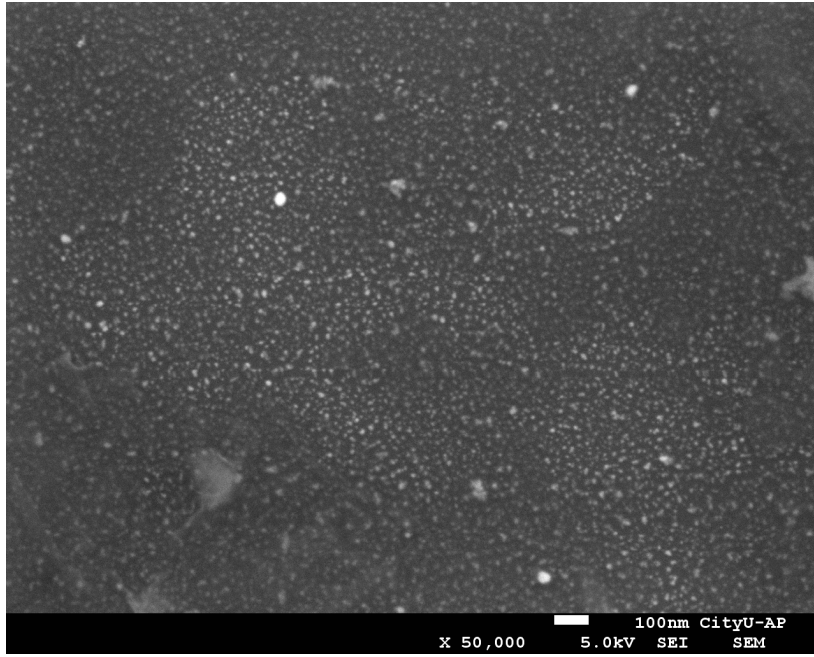

**Figure S2.** SEM image of the MoS<sub>2</sub> nanosheets self-aligned on the Au NPs monolayer

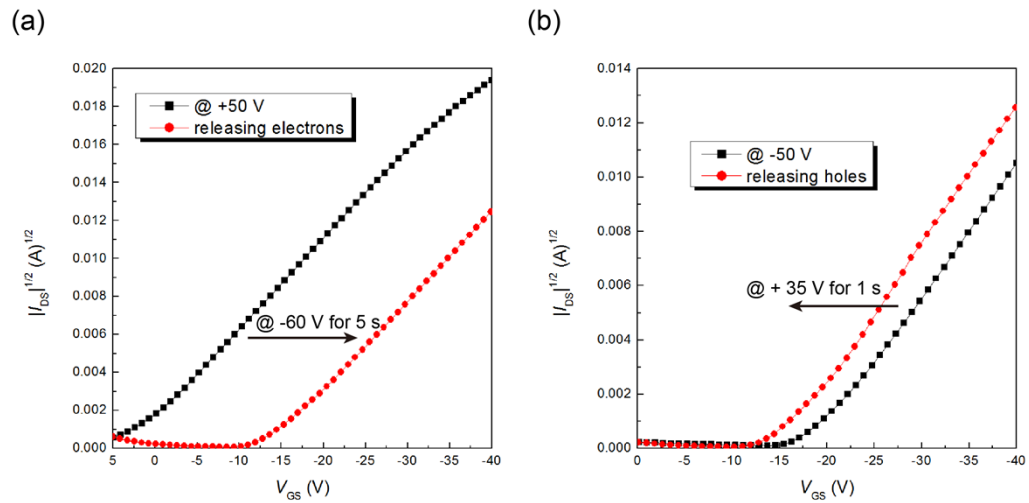

**Figure S3. The erasing operation of Ag NPs-MoS<sub>2</sub> memory device.** The gate bias of erasing operation to release electrons after positively programming operation is -60 V for 5 s and the gate bias to release holes after negatively programming operation is +35 V for 1 s.

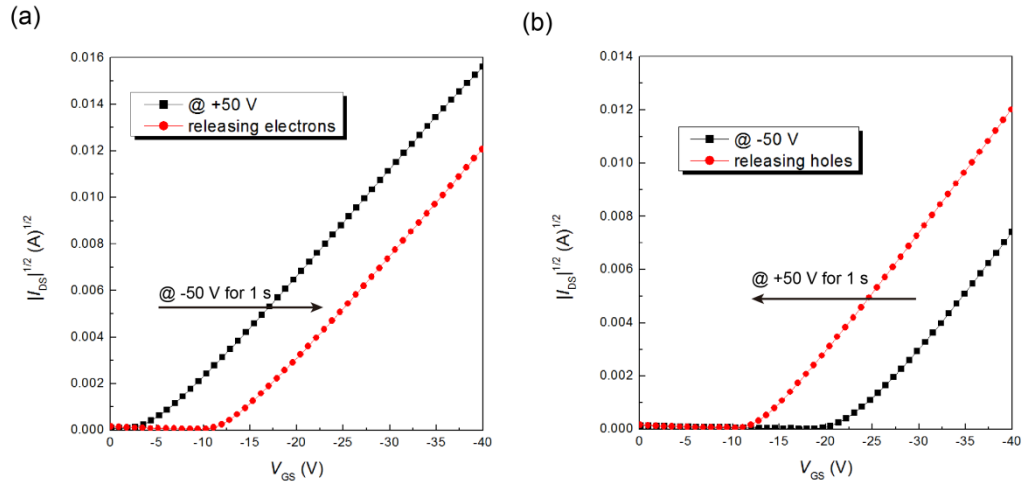

**Figure S4. The erasing operation of Au NPs-MoS<sub>2</sub> memory device.** The gate bias of erasing operation to release electrons after positively programming operation is  $-50$  V for 1 s and the gate bias to release holes after negatively programming operation is  $+50$  V for 1 s.

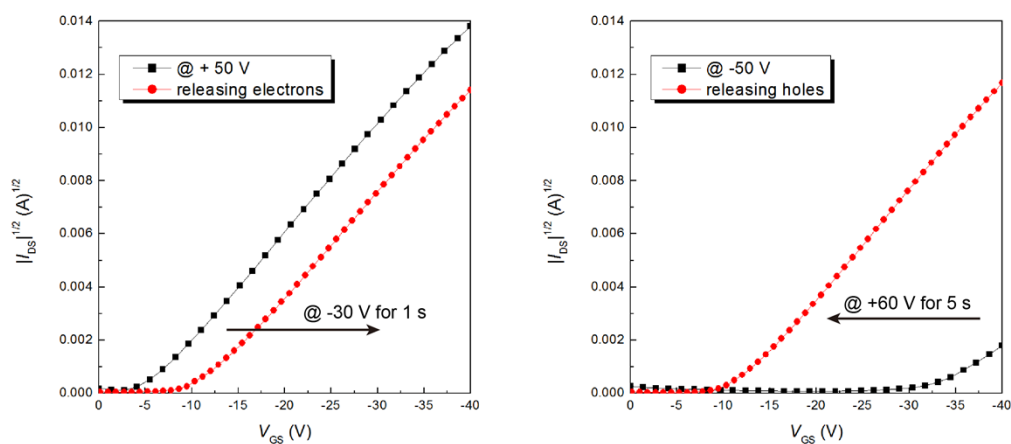

**Figure S5. The erasing operation of Pt NPs-MoS<sub>2</sub> memory device.** The gate bias of erasing operation to release electrons after positively programming operation is -30 V for 1 s and the gate bias to release holes after negatively programming operation is +60 V for 5 s.

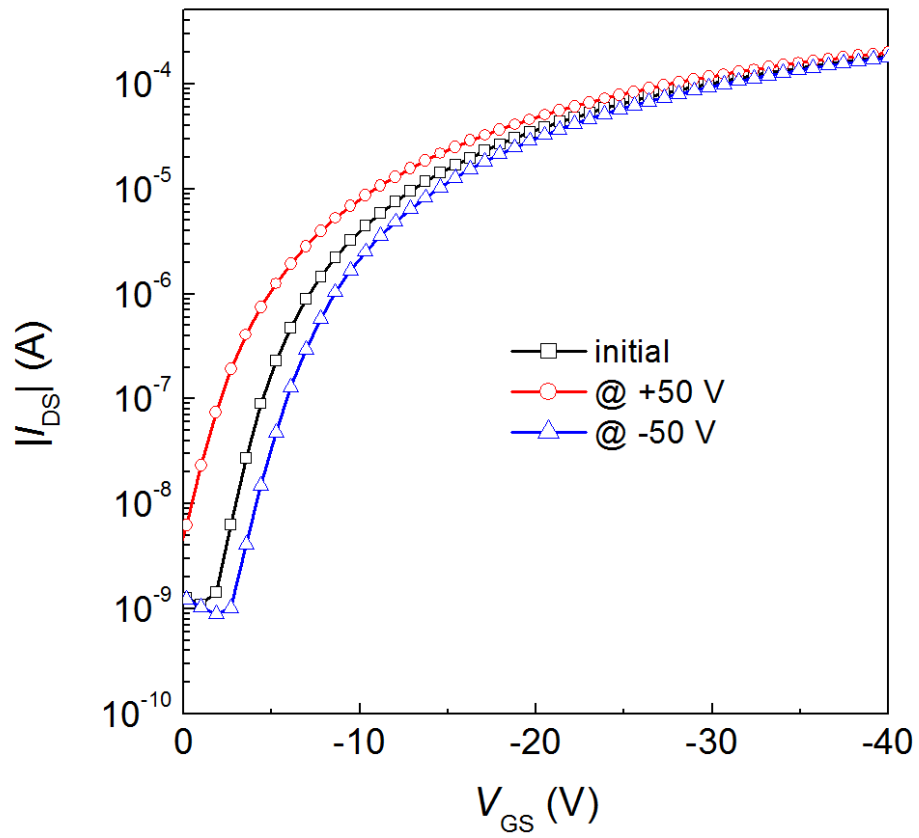

**Figure S6. Transfer characteristics of the standard FET devices under programming operation.** The positively programming gate bias is set as +50 V for 1 s and the negatively programming operation is set as -50 V for 1 s.

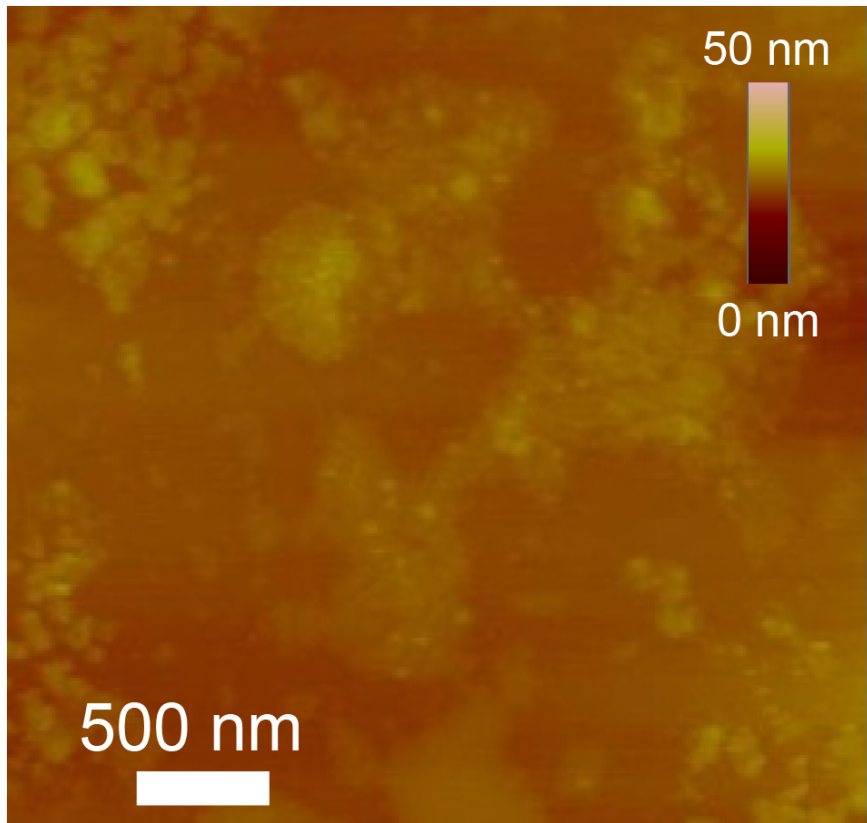

**Figure S7.** Tapping-mode AFM height image of fabricated MoS<sub>2</sub> film for pristine MoS<sub>2</sub> flash memory.



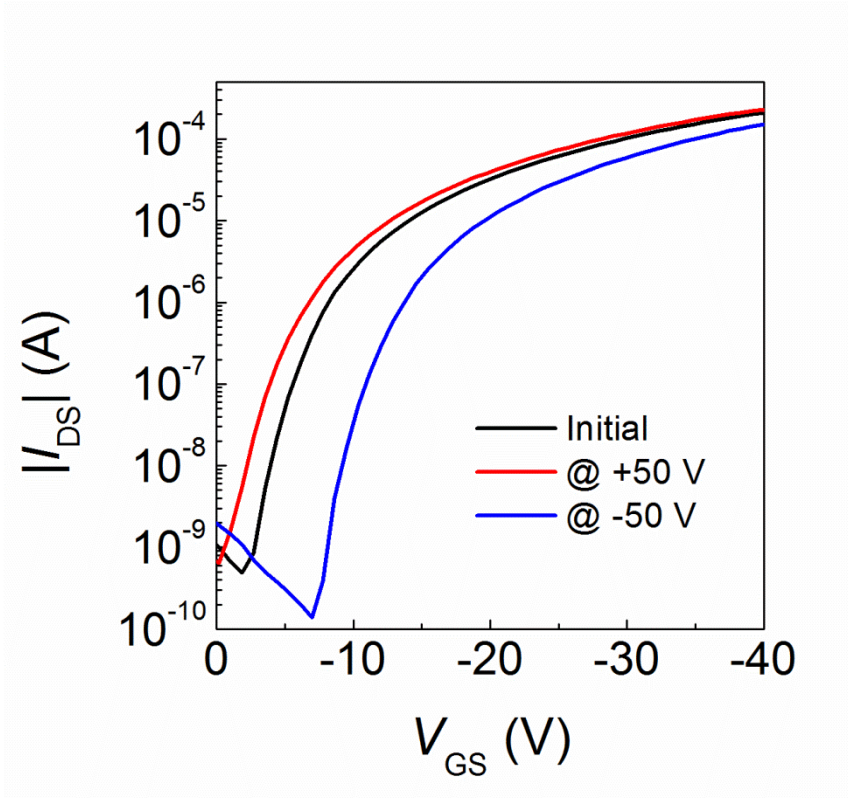

**Figure S8. Transfer characteristics of the the memory devices with only Ag nanoparticles.** The positively programming gate bias is set as +50 V for 1 s and the negatively programming operation is set as -50 V for 1 s.

## Au NPs-MoS<sub>2</sub>

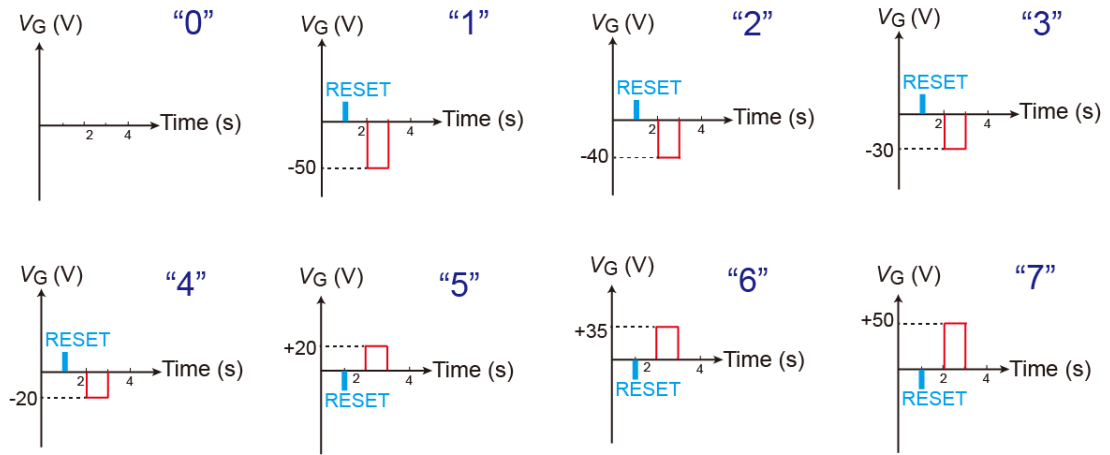

**Figure S9.**  $V_{GS}$  signals used for programming the flash memories into 8 data states ("0" to "7") in Au NPs-MoS<sub>2</sub> flash memories.

## Pt NPs-MoS<sub>2</sub>

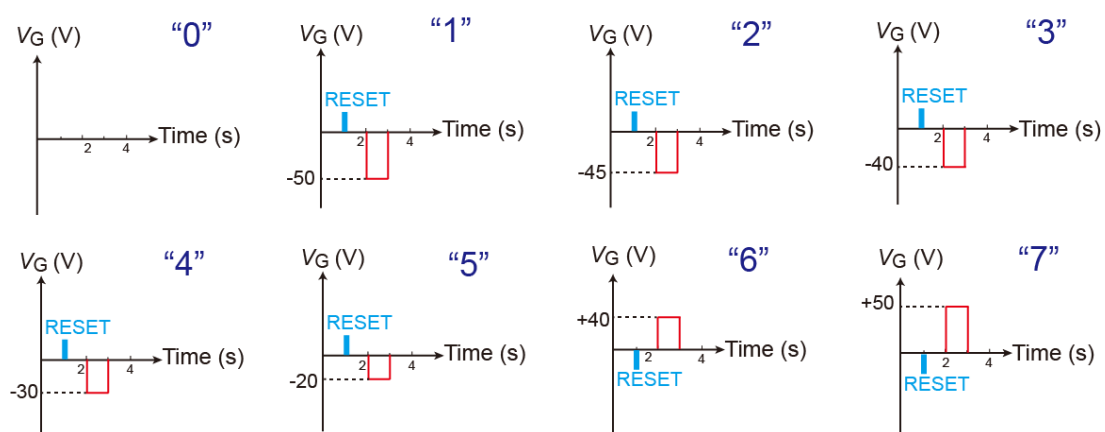

**Figure S10.**  $V_{GS}$  signals used for programming the flash memories into 8 data states ("0" to "7") in Pt NPs-MoS<sub>2</sub> flash memories.

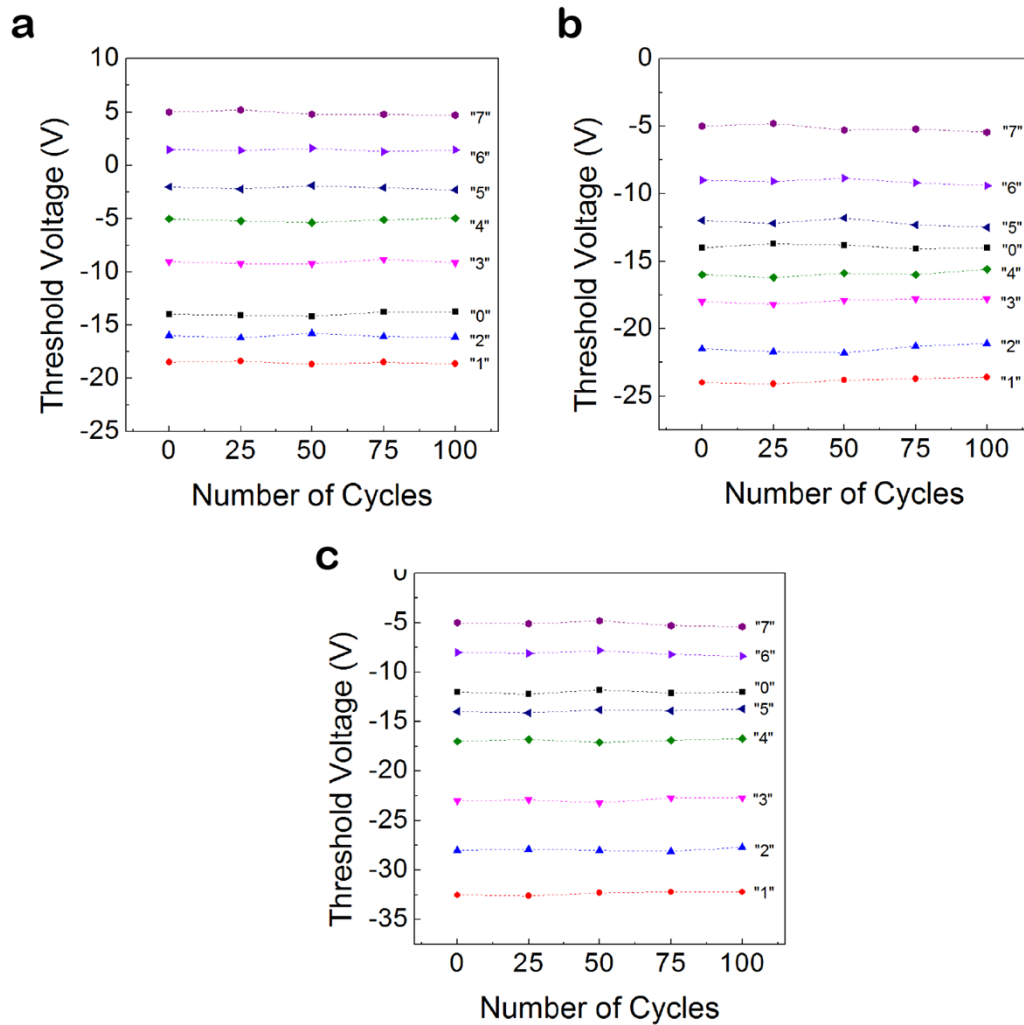

**Figure S11.** Data levels recorded for 100 sequential cycles of flash memories based on (a) Ag NPs-MoS<sub>2</sub> structure, (b) Au NPs-MoS<sub>2</sub> structure and (c) Pt NPs-MoS<sub>2</sub> structure.
